# Supplementary material for: RANBP9 and RANBP10 cooperate in regulating non-small cell lung cancer proliferation
Source: Research Square preprint supplement (doi:10.21203/rs.3.rs-5707591/v1), 2025-02-03

# Supplementary Figure 9

## A

Induction: Doxycycline 1 µg/ml 24 hours

MG132 (10µM 4hours)

4X A549 iBP9 not treated (9N)

4X A549 iBP9 DOXY (9D)

4X A549 iBP10 not treated (10N)

4X A549 iBP10 DOXY (10D)

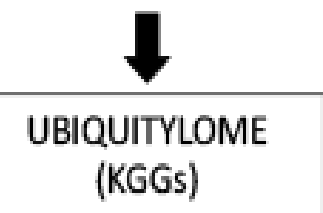

## F

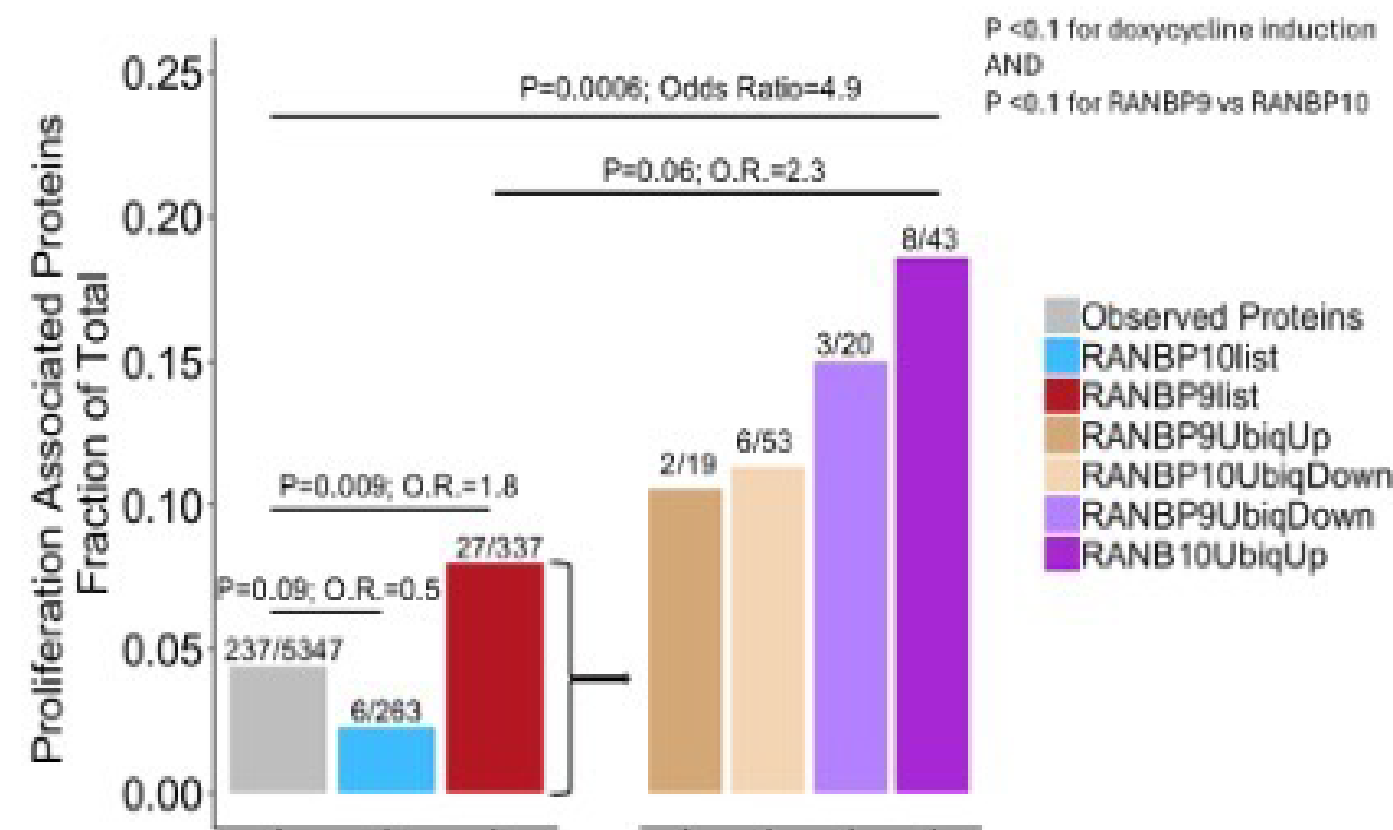

## B

BP9 positively associated

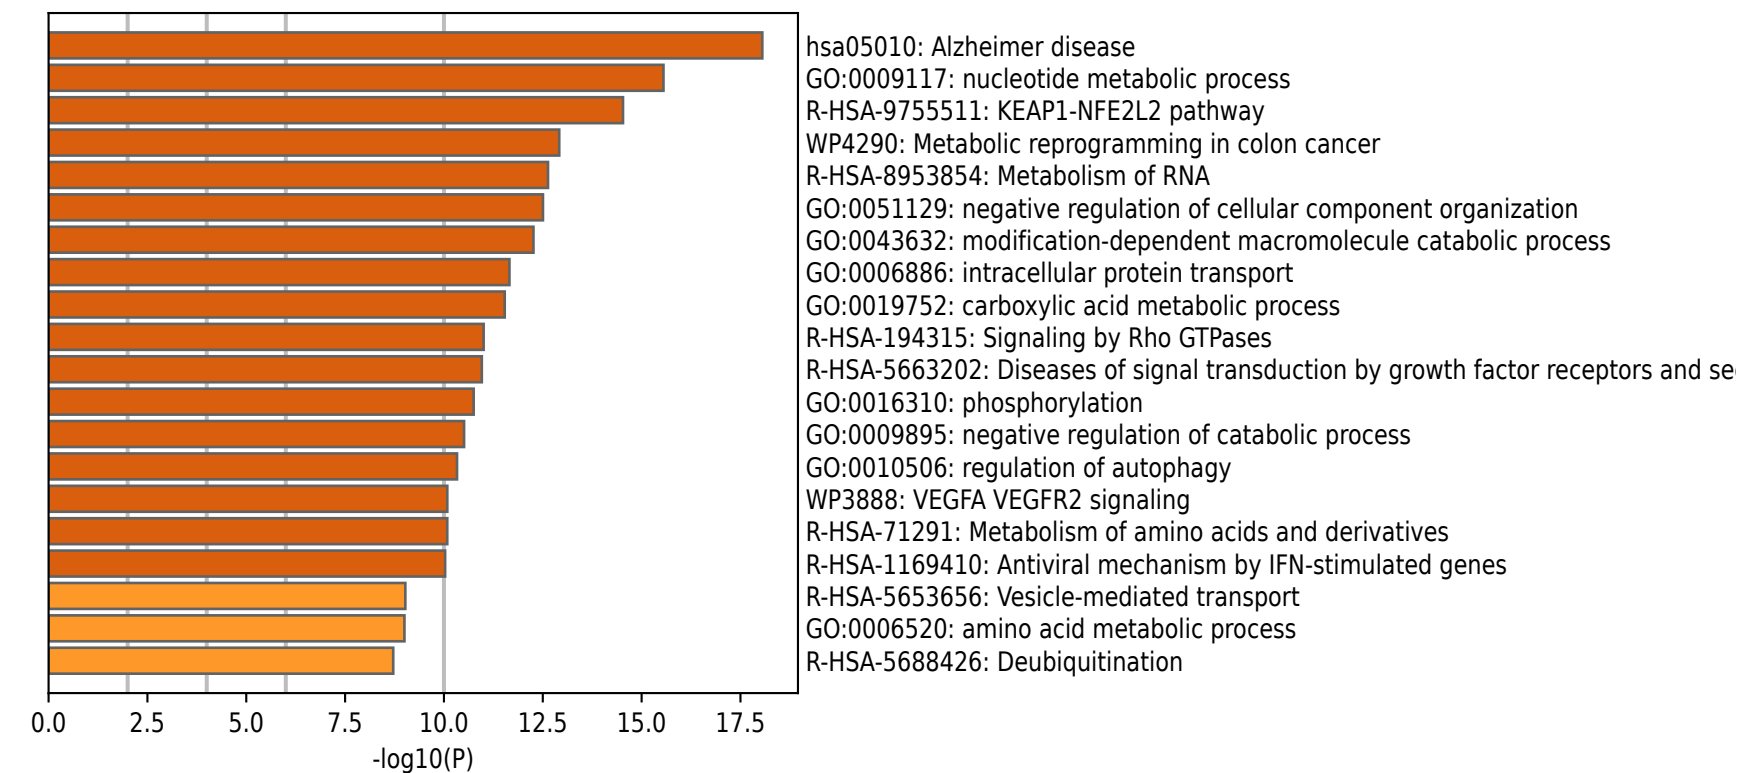

## C

BP9 negatively associated

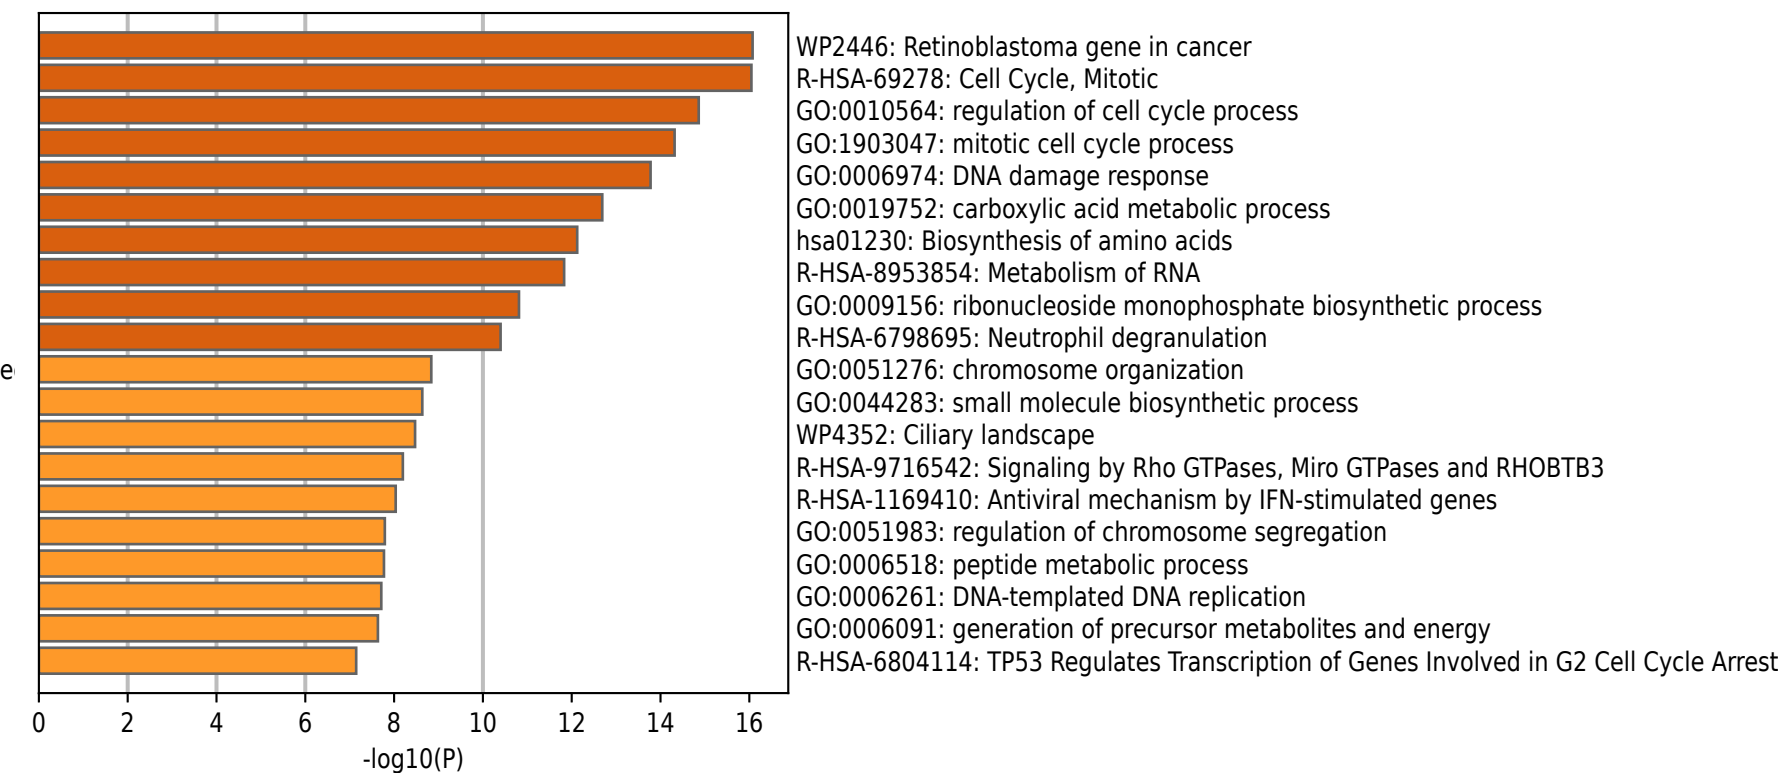

## D

BP10 positively associated

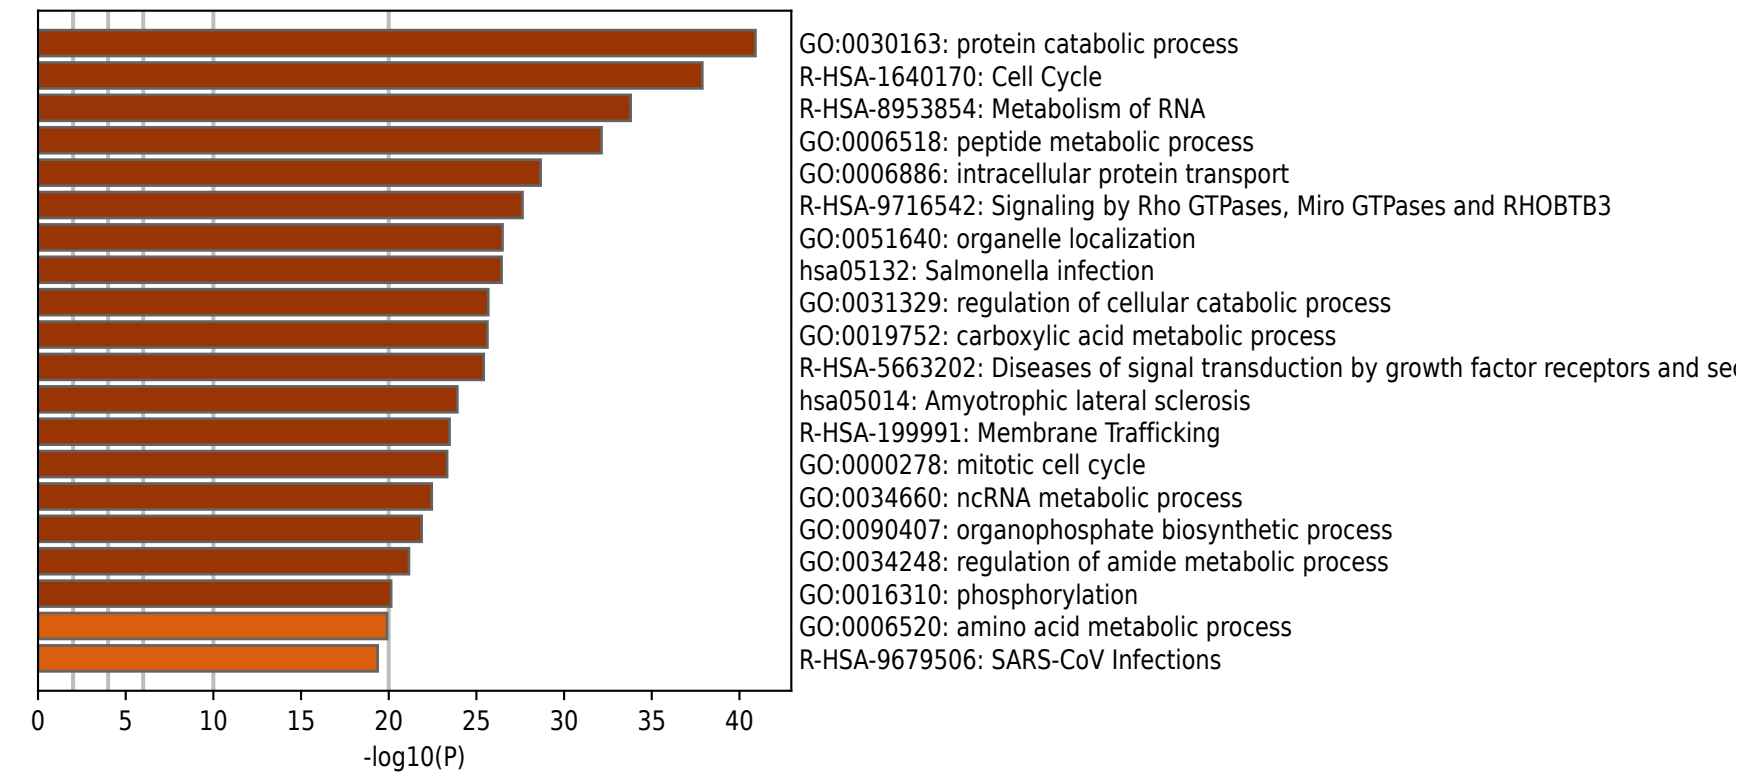

## E

BP10 negatively associated

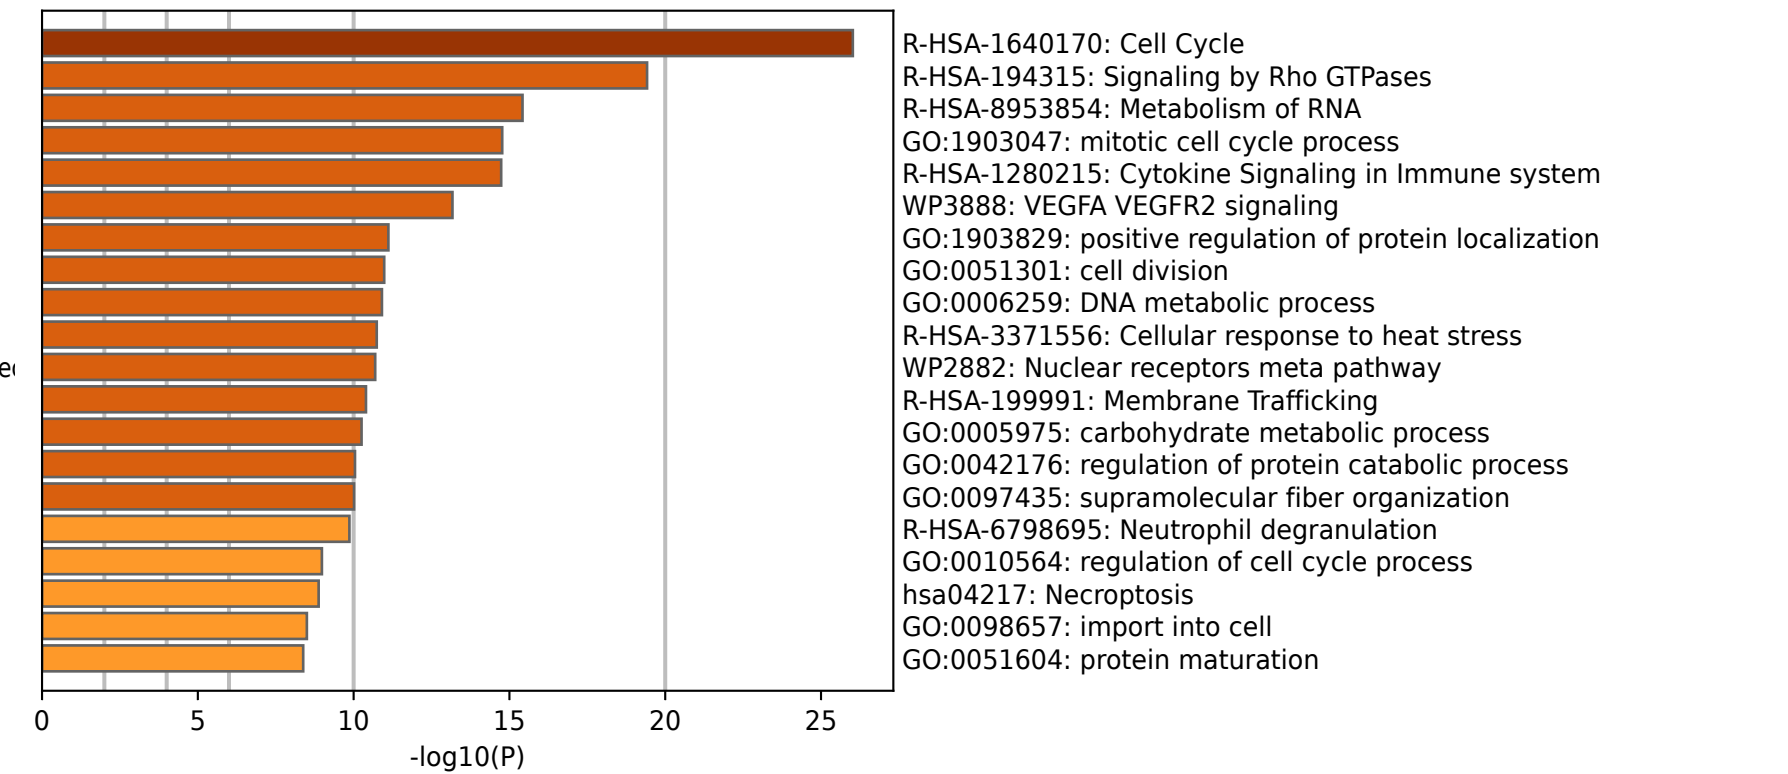

Supplement: Supplementary file 2 [file 3871c7db085b8f9743109c8d.pdf]
