# Supplementary material for: RANBP9 and RANBP10 cooperate in regulating non-small cell lung cancer proliferation
Source: Research Square preprint supplement (doi:10.21203/rs.3.rs-5707591/v1), 2025-02-03
Supplement: Supplementary file 3 [file dca678ff7a8719a429302e02.pdf]

## Normal lung

### CTLH<sup>BP9</sup> COMPLEX

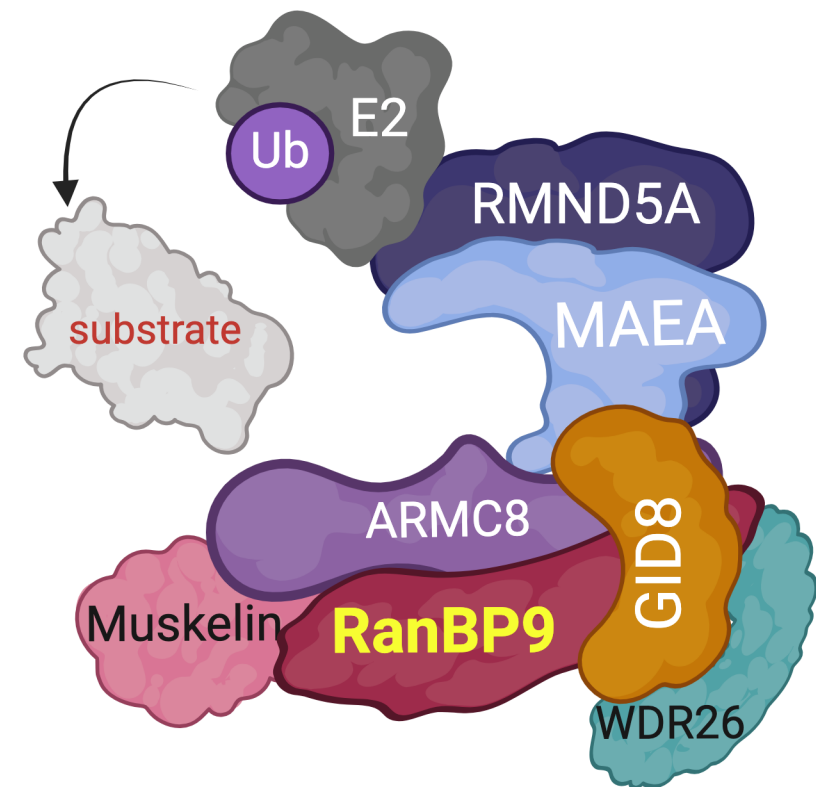

### CTLH<sup>BP10</sup> COMPLEX

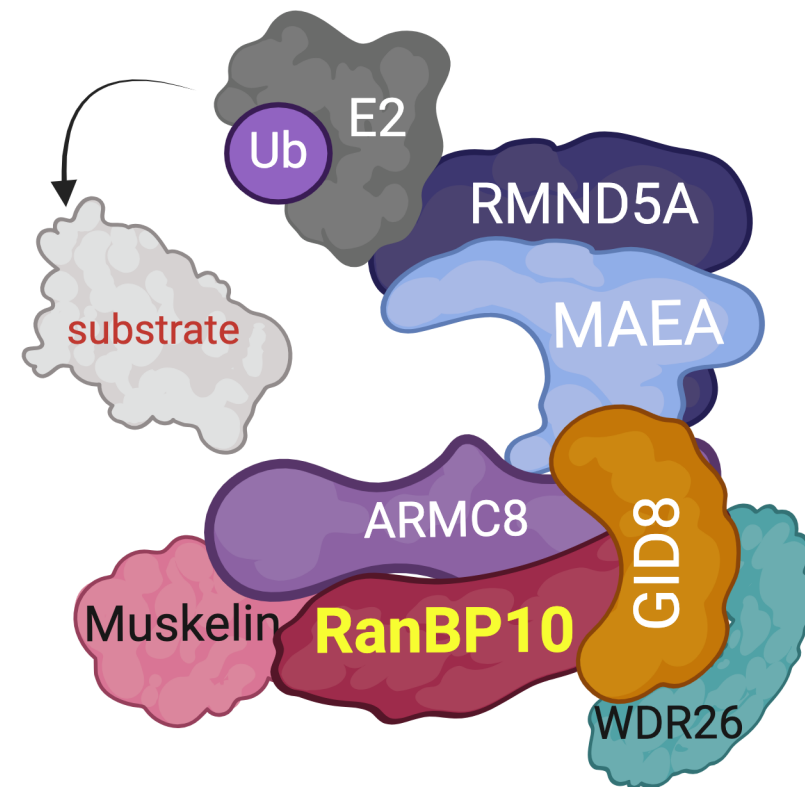

In normal lung cells, the CTLH E3 ligase can be built on the scaffold provided by RANBP9 (CTLH<sup>BP9</sup>) and RANBP10 (CTLH<sup>BP10</sup>).

In NSCLC, the expression of RANBP10 is downregulated while the expression of RANBP9 increases, but both proteins are still present, and both protect their binding partner GID8 from degradation. The CTLH<sup>BP9</sup> and CTLH<sup>BP10</sup> complexes cross-regulate each other at protein level.

## NSCLC

### CTLH<sup>BP9</sup> COMPLEX

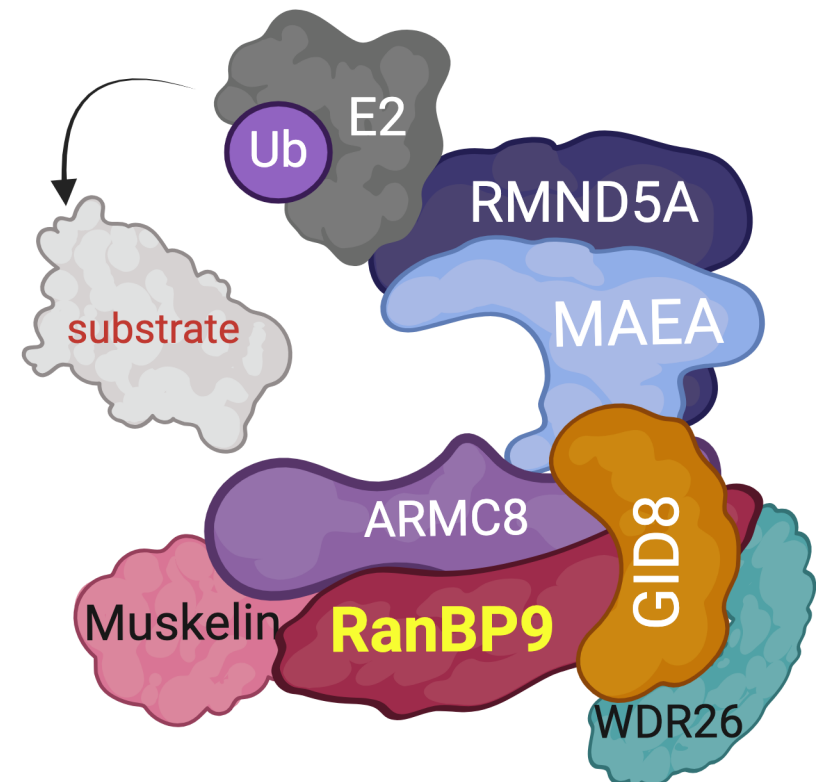

### CTLH<sup>BP10</sup> COMPLEX

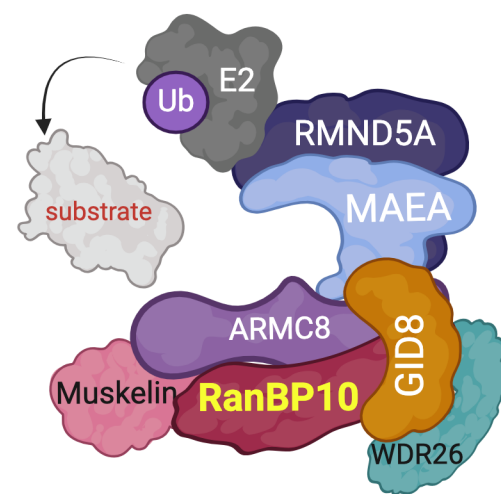

**Pro-tumorigenic**  
**Pro-proliferative**

The combined increase of CTLH<sup>BP9</sup> and decrease of CTLH<sup>BP10</sup> is pro-tumorigenic: it causes ubiquitylation and amount changes of proteins involved in cell proliferation, and other pathways critical to NSCLC pathogenesis.
