# Supplementary figures and images for: RANBP9 and RANBP10 cooperate in regulating non-small cell lung cancer proliferation
Source: Research Square preprint supplement (doi:10.21203/rs.3.rs-5707591/v1), 2025-02-03

# Supplementary Figure 6

## A

### LUAD

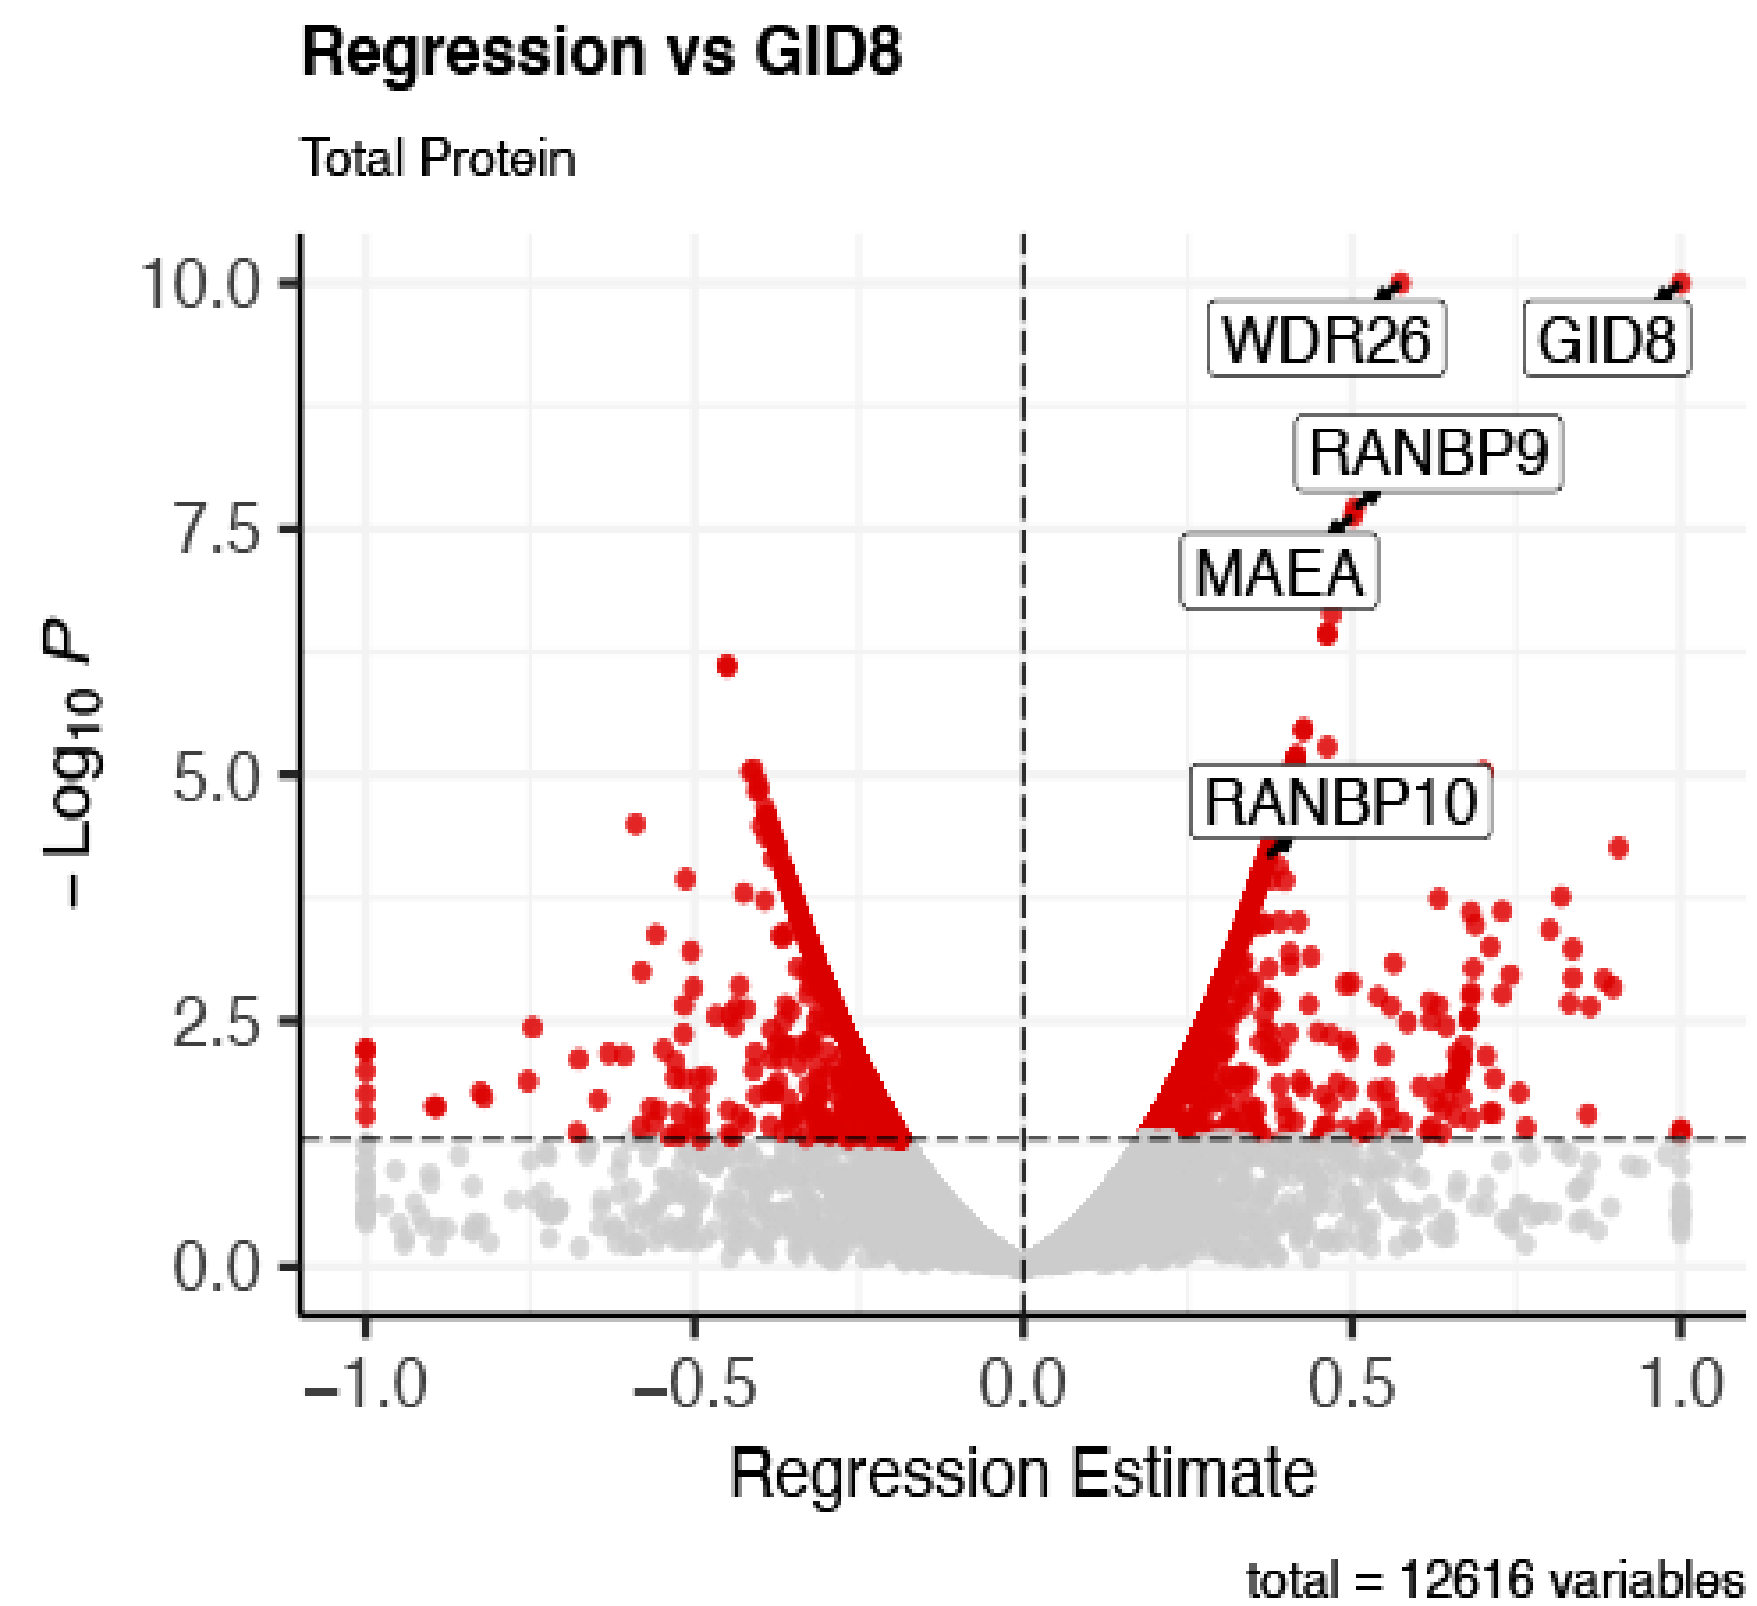

## B

### LUSQ

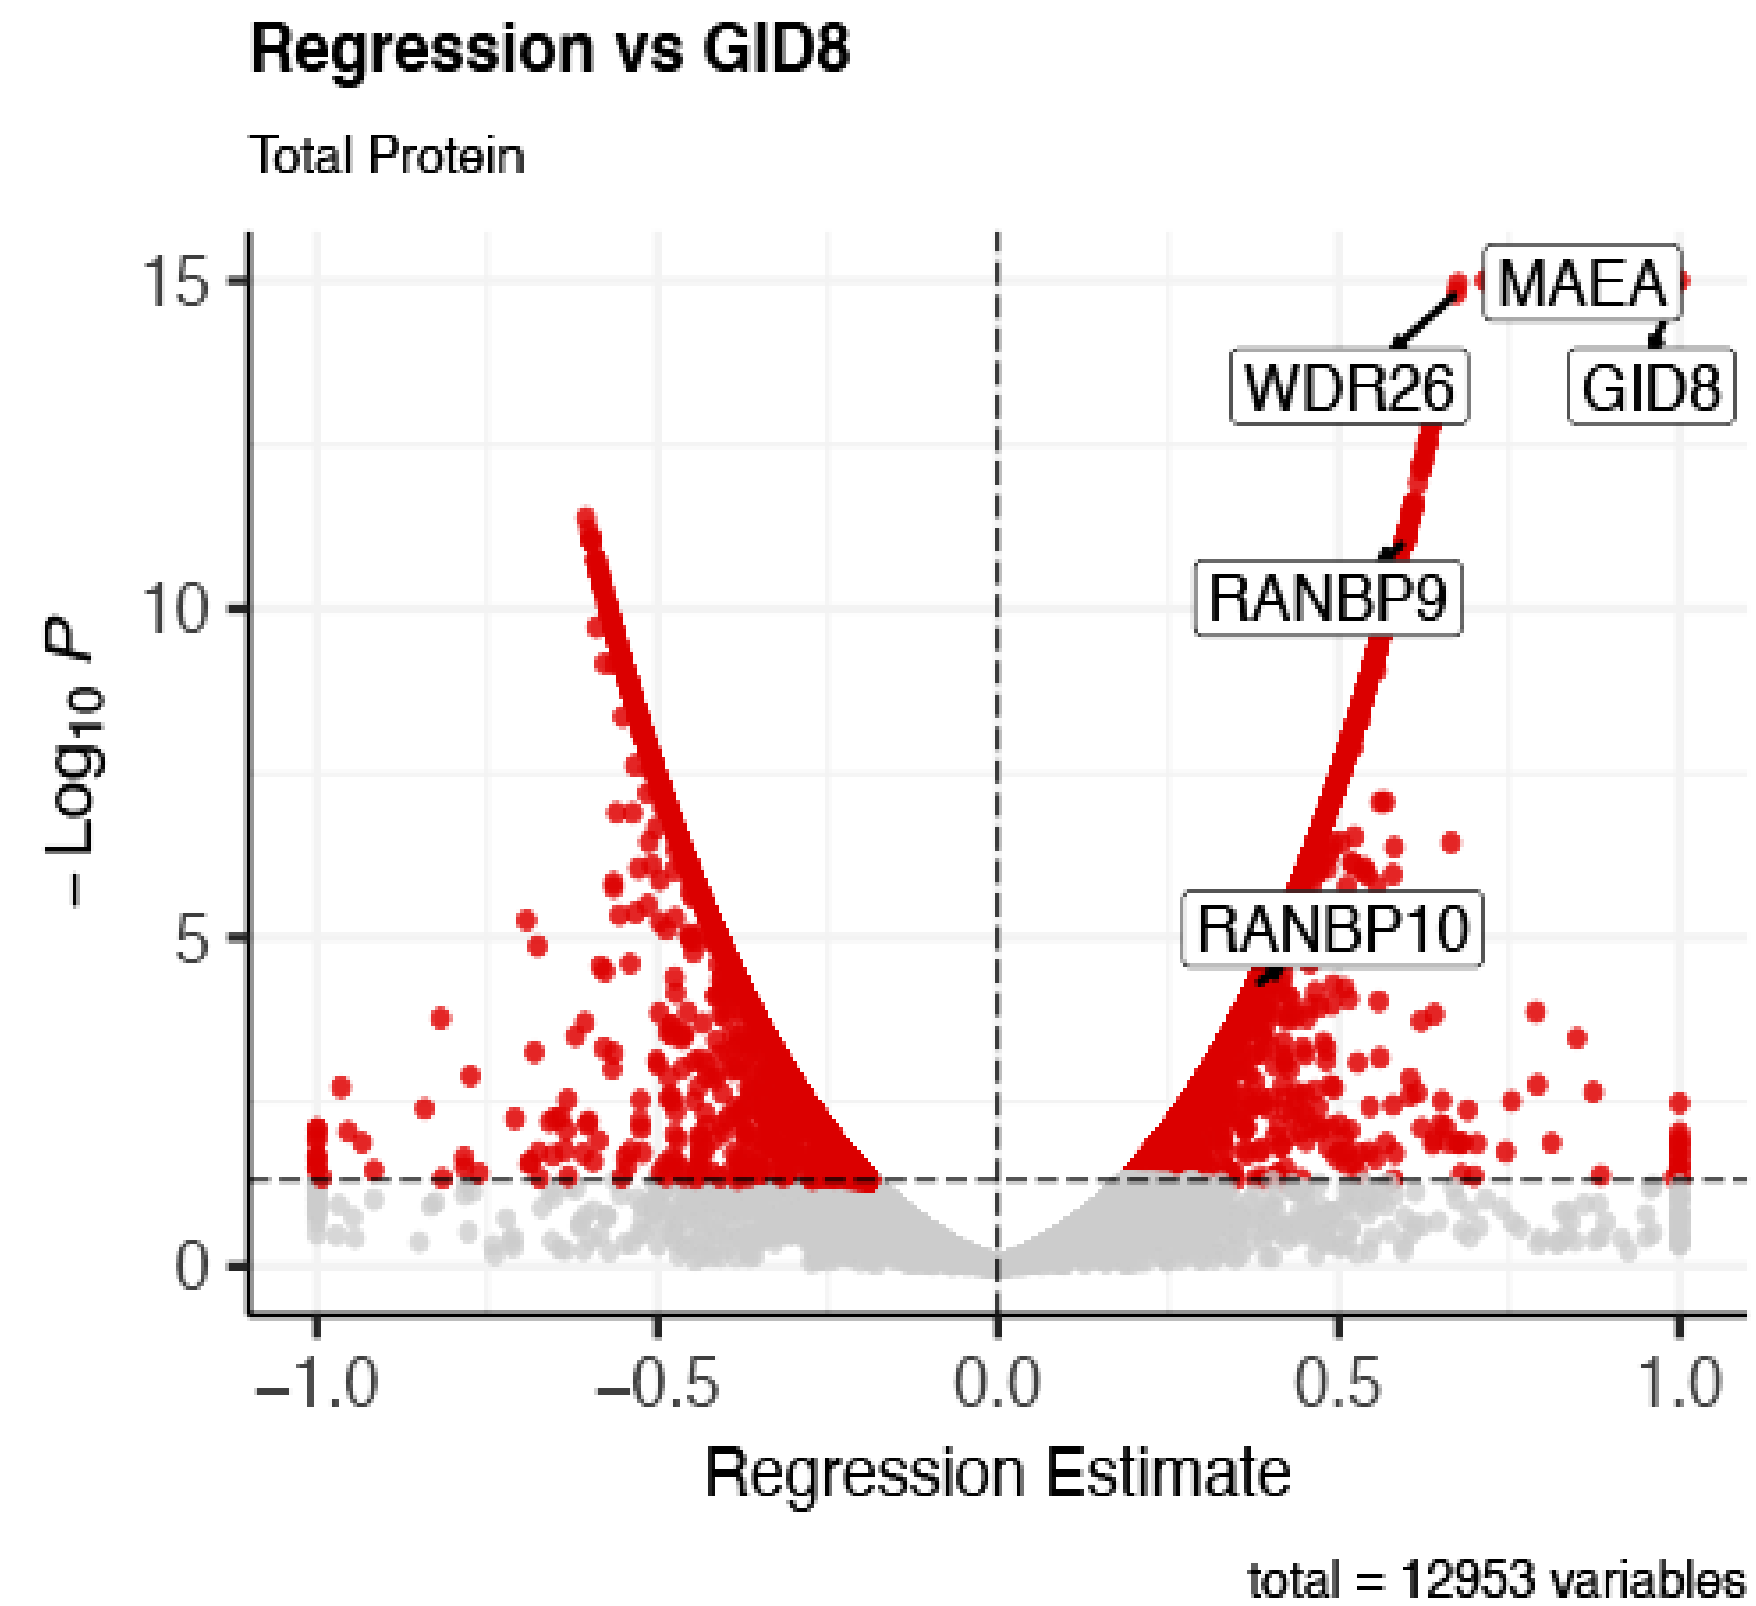

Supplement: Supplementary file 1 [file 1430a0f9b6ae675c817506e9.pdf]

# Supplementary Figure 2

## A

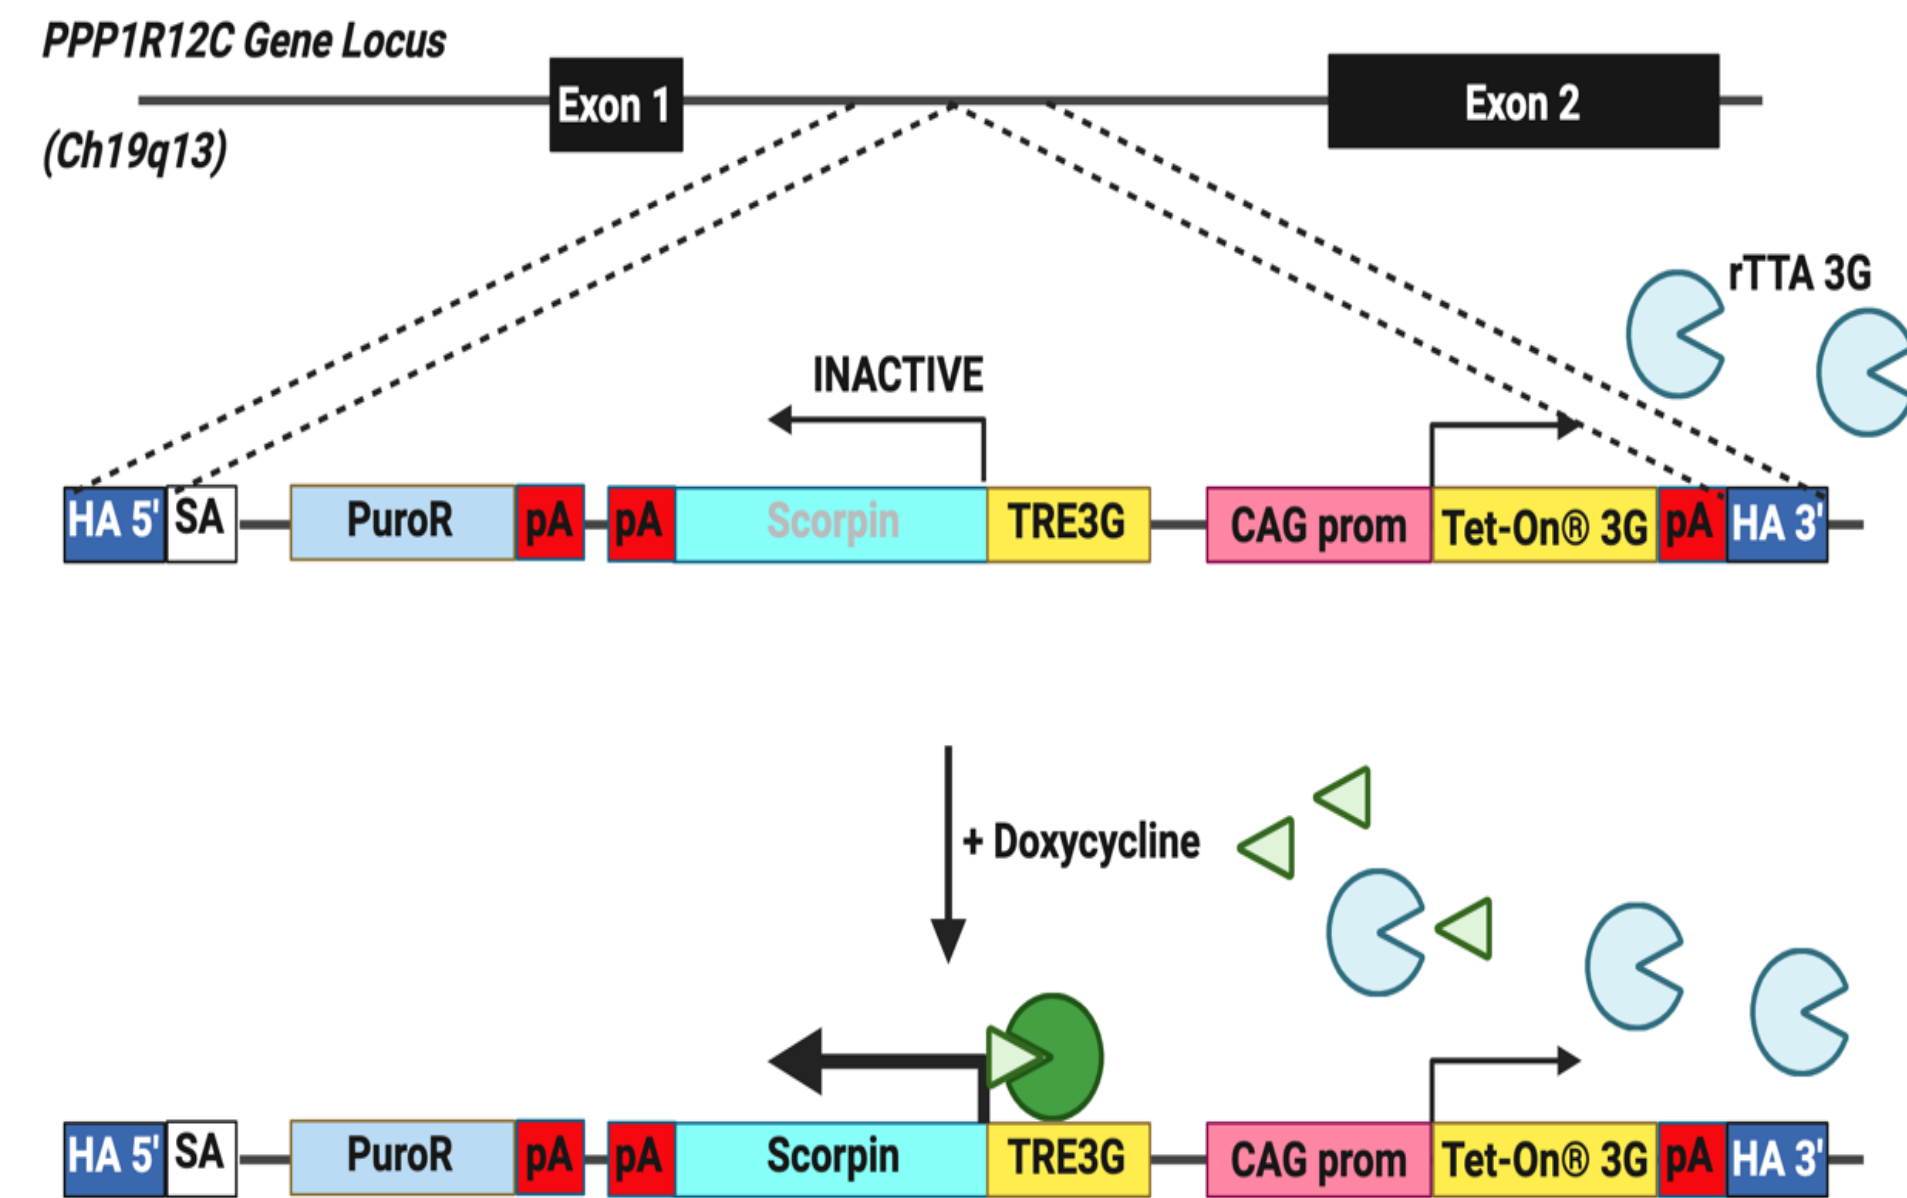

## B

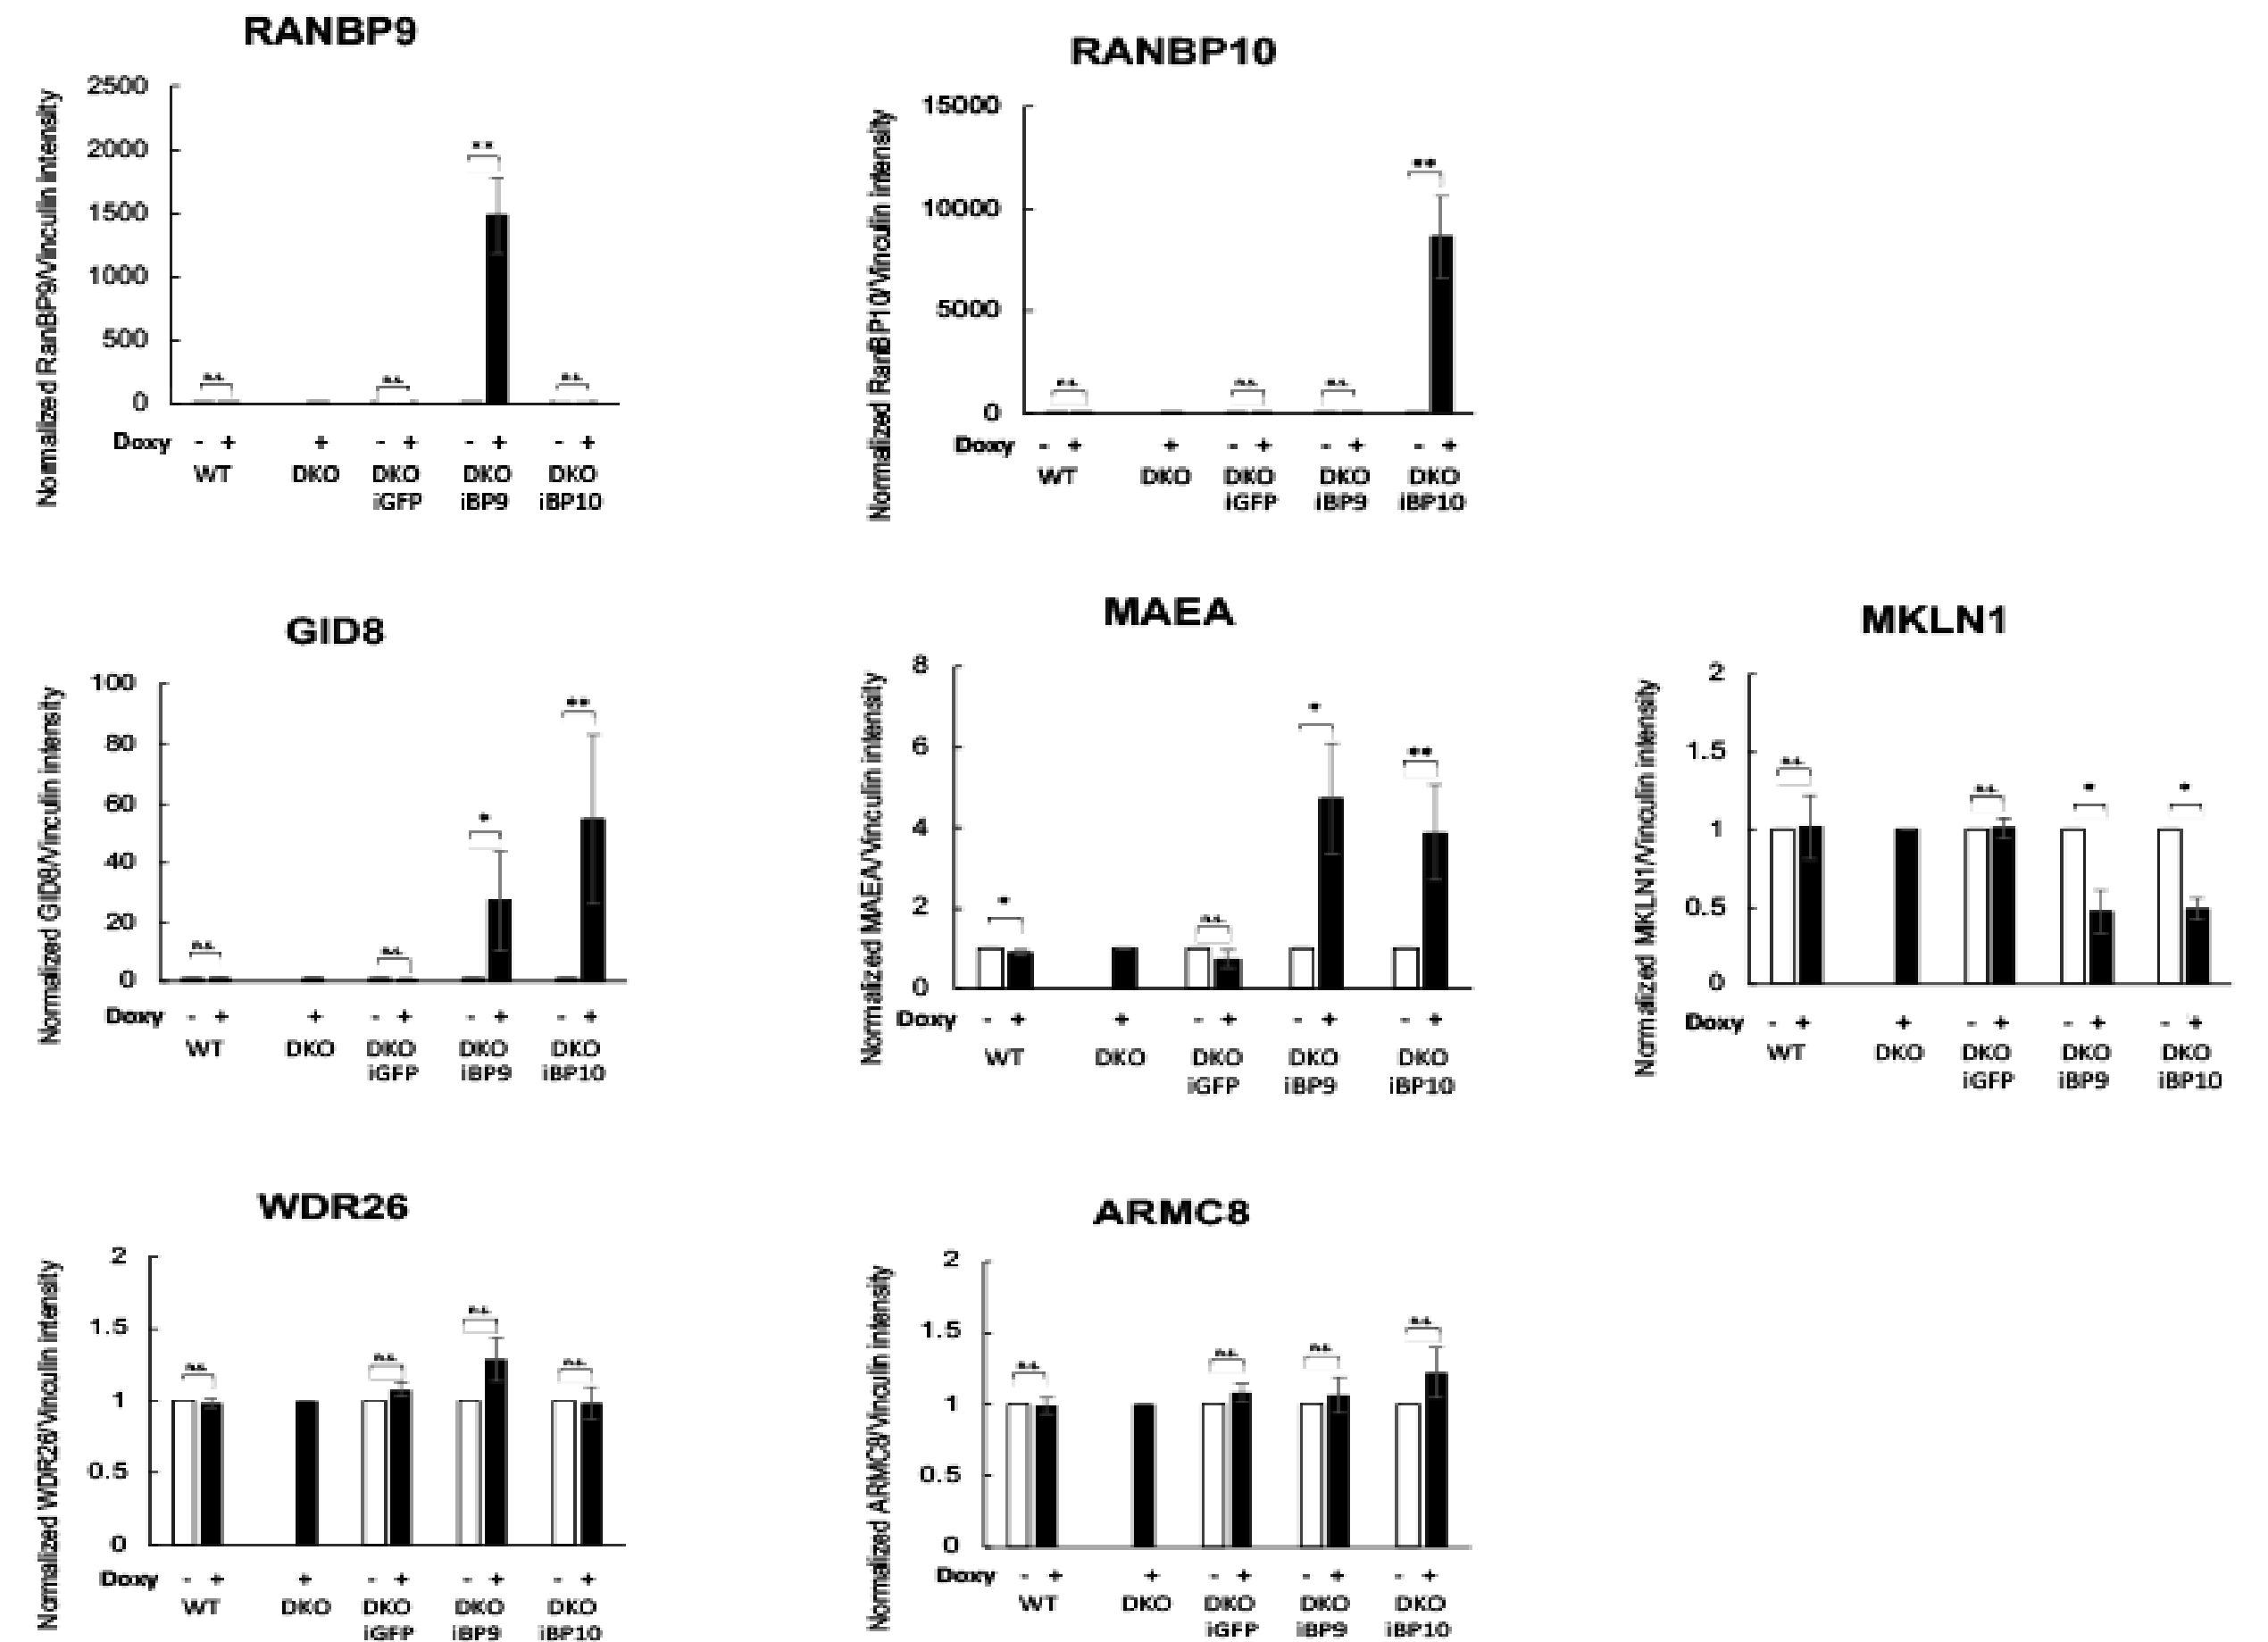

Supplement: Supplementary file 4 [file e01eae6e5387e96e6afcc808.pdf]
